# Supplementary material
Source: Springer Nature journal article supplement (https://www.springermedizin.de/resource/supplementary/12871_2013_294_MOESM1_ESM.pdf/9429270)

**Pre-IMC period**

**IMC period**

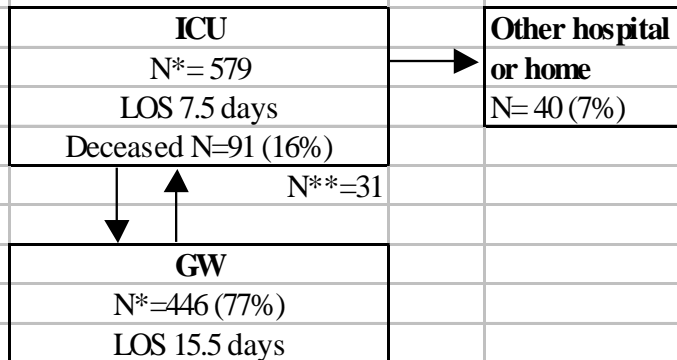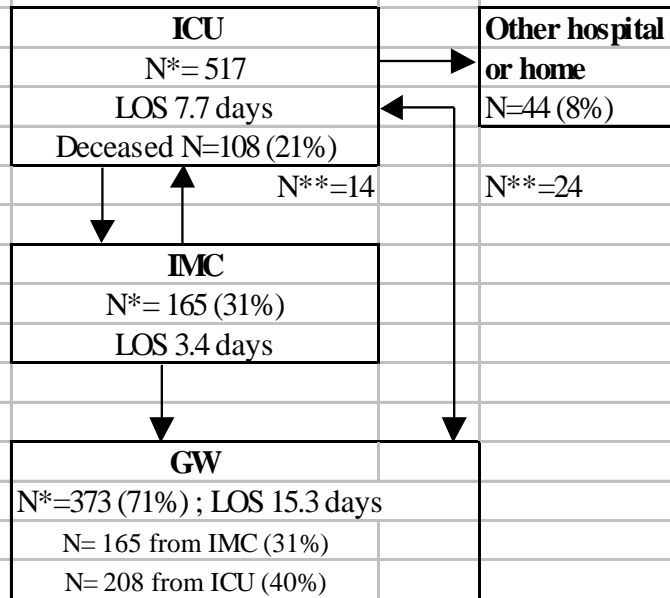

Supplement: MOESM1 [file 9429270]
